# Supplementary material
Source: publisher figshare collection journal article supplement (https://sage.figshare.com/ndownloader/files/17398541)
Supplement: Supplementary file 1 [file 17398541]

| Items                                                                                   | Possible Responses (score) |        |
|-----------------------------------------------------------------------------------------|----------------------------|--------|
|                                                                                         | Yes = 1                    | No = 0 |
| 1. Do you feel sad for most of the day?                                                 |                            |        |
| 2. Do you feel so sad that you feel like crying?                                        |                            |        |
| 3. Do you have thoughts that you would be better off dead?                              |                            |        |
| 4. Do you have little interest or pleasure in doing things?                             |                            |        |
| 5. Do you feel disappointed in yourself or do you blame yourself?                       |                            |        |
| 6. Do you feel like you have lost confidence in yourself?                               |                            |        |
| 7. Do you feel like you want to be left alone?                                          |                            |        |
| 8. Do you feel worthless?                                                               |                            |        |
| 9. Do you feel like you are unable to concentrate?                                      |                            |        |
| 10. Do you feel forgetful?                                                              |                            |        |
| 11. Do you feel mentally slow or sluggish?                                              |                            |        |
| 12. Do you feel like you are moving or speaking still slowly that other people noticed? |                            |        |
| 13. Do you feel tired or have little energy?                                            |                            |        |
| 14. Do you have lack of/decreased appetite?                                             |                            |        |
| 15. Do you have trouble falling or staying asleep, or sleeping too much?                |                            |        |
